# Supplementary material for: Prognostic models for breast cancer: a systematic review
Source: BMC Cancer. 2019 Mar 14;19:230. doi: 10.1186/s12885-019-5442-6 (PMC6419427; doi:10.1186/s12885-019-5442-6)
Supplement: Supplementary file 1 — Search terms. (XLSX 10 kb) [file 12885_2019_5442_MOESM1_ESM.xlsx]

## Sheet: Additional file 1
Additional file 1: Search terms
Database	Search terms
EMBASE	1. prognostic.m_titl. 2. prognosis.m_titl. 3. prognostication.m_titl. 4. prognosticator.m_titl. 5. prognosticators.m_titl. 6. predict.m_titl. 7. predictive.m_titl. 8. predicting.m_titl. 9. predictor.m_titl. 10. prediction.m_titl. 11. predictions.m_titl. 12. predictors.m_titl. 13. decision.m_titl. 14. decide.m_titl. 15. deciding.m_titl. 16. 1 or 2 or 3 or 4 or 5 or 6 or 7 or 8 or 9 or 10 or 11 or …	27. programs.m_titl. 28. programme.m_titl. 29. programmes.m_titl. 30. calculator.m_titl. 31. calculators.m_titl. 32. calculating.m_titl. 33. calculation.m_titl. 34. 17 or 18 or 19 or 20 or 21 or 22 or 23 or 24 or 25 or 26 or 27 or 28 or 29 or 30 or 31 or 32 or 33 35. 16 and 34 36. "decision aid".m_titl. 37. "decision aids".m_titl. 38. "decision support technique".m_titl. 39. "decision support tec…	53. neoplasm.m_titl. 54. neoplasms.m_titl. 55. malignancy.m_titl. 56. malignancies.m_titl. 57. carcinoma.m_titl. 58. carcinomas.m_titl. 59. 47 or 48 or 49 or 50 or 51 or 52 or 53 or 54 or 55 or 56 or 57 or 58 60. 42 and 46 and 59 61. limit 60 to (english language and yr="1883 - 2016")
PUBMED	(((((((((((prognos*[Title] OR predict*[Title] OR decid*[Title] OR decision*[Title]) AND (model*[Title] OR tool*[Title] OR nomogram*[Title] OR index*[Title] OR indices[Title] OR program*[Title] OR calculat*[Title])) OR "decision aid*"[Title] OR "decision support technique*"[Title] OR "decision support system*"[Title]))) AND (breast[Title] OR ductal[Title] OR lobular[Title])) AND (cancer[Title] OR …
Web of Science	TITLE: (((prognos* OR predict* OR decid* OR decision*) AND (model* OR tool* OR nomogram* OR index* OR indices OR program* OR calculat*)) OR "decision aid*" OR "decision support technique*" OR "decision support system*") AND TITLE: (breast OR ductal OR lobular) AND TITLE: (cancer OR tumor* OR tumour* OR oncology OR neoplasm* OR malignanc* OR carcinoma*) Refined by: LANGUAGES: ( ENGLISH ) AND [excl…
COCHRANE	(((prognos* OR predict* OR decid* OR decision*) AND (model* OR tool* OR nomogram* OR index* OR indices OR program* OR calculat*)) OR "decision aid*" OR "decision support technique*" OR "decision support system*") AND (breast OR ductal OR lobular) AND (cancer OR tumor* OR tumour* OR oncology OR neoplasm* OR malignanc* OR carcinoma*) in Record Title in Other Reviews
