# Supplementary material for: Prognostic models for breast cancer: a systematic review
Source: BMC Cancer. 2019 Mar 14;19:230. doi: 10.1186/s12885-019-5442-6 (PMC6419427; doi:10.1186/s12885-019-5442-6)
Supplement: Supplementary file 2 — Model development studies that were excluded because of no full text. (XLSX 13 kb) [file 12885_2019_5442_MOESM2_ESM.xlsx]

## Sheet: Additional file 2
Additional file 2: Model development studies that were excluded because of no full text
No	Citation	Form of publication	Study design	Source of data	Sample size	Participants	Country	Time of recruitment	Method of development	Outcomes	Predictors	Internal validation Sample size	Internal validation Method of sampling	Conclusion by authors
1	Carbognin L, Sperduti I, Furlanetto J, Vicentini C, Nortilli R, Brunelli M, et al. Development of a risk model to identity prognostic ‘outliers’ underwent surgery for early-stage invasive lobular breast carcinoma (ILBC) according to clinical and pathological factors. Annals of Oncology 2015;26(suppl_6):vi7-vi8.	Online abstract	Retrospective		405	Early invasive lobular breast carcinoma			Cox PH regression	OS	Nodal involvement, Ki67, age, radiotherapy	405		The model accurately separated patients into risk classes.
										DFS
2	Chianakwalam C, Bendall S, Bates T. Comparative analysis of artificial neural networks and the Nottingham Index in breast cancer prognosis. Br J Surg 2004 SEP 2004;91(9):1226-1226.	Online abstract			1243				Artificial neural networks	BCSS	Histological grade, tumour size, axillary lymph node status	311	Compare with the NPI	The model could predict BCSS as accurately as the NPI
3	Dierickx I, van Belle V, Vandorpe T, Wildiers H, Leunen K, Peeters S, et al. A prognostic model for breast cancer-related events in primary operated invasive lobular breast cancers from one centre. European Journal of Cancer Supplements 2010;8(3):94.	Conference presentation	Retrospective	Hospital-based	380	Operated invasive lobular breast cancer		2000-2006	Cox PH regression	DFS	Node positive, nuclear atypia, mitotic count			No significant predictors were found in node negative invasive lobular breast cancer.
														In node positive invasive lobular breast cancer, the combination of nuclear atypia and mitotic index distinguished a medium and high risk group.
4	Dorairaj JJ, Wall D, Newell J, Blamey RW, Sweeney KJ, Ball G, et al. A Breast Cancer Prognostic Index Utilizing Lymph Node Ratio. Cancer Research 2011;71(24 Supplement):P2-12-15.	Online abstract	Prospective	Hospital-based	1668	Primary operable breast cancer		1990-2010		OS	Age, lymph node ratio, stage, molecular subtype		Compare with the NPI	The model performed as well as the NPI.
5	Prasad R, Byrne G, Wilson M, Barr L, Baildam AD, Morris J, et al. Which women with screen detected breast cancers (SDBC) require chemotherapy? (New index predicting recurrence and mortality). Br J Surg 2003 JUN 2003;90:99-99.	Conference presentation	Hospital-based	Hospital-based	962	Screen detected breast cancer		1990-1998		OS	Tumour grade, size, node status			This model could identify 10% of screen detected breast cancers at high risk of recurrence
										DFS
6	Rodionov V, Panchenko S, Khajrullin R, Kometova V, Ajupova S, Alieva R, et al. Integrated pathological index as prognostic factor of breast cancer patients' survival. Eur J Cancer 2014 March 2014;50:S198.	Conference presentation	Retrospective	Hospital-based	128		Russia	2004-2007		OS	Degree of cellular differentiation, cellular polymorphism, MAI, growth pattern, LVI, stromal reaction			The predicted outcomes were statistically correlated with the observed outcomes.
7	Rosenberg J. Modelling breast cancer recurrence times to aid treatment decisions. Medical Decision Making 1998 OCT-DEC 1998;18(4):487-487.	Conference presentation		Hospital-based and RCT-based						Recurrence time				The predicted outcomes were consistent with the observed outcomes.
8	Tai P, Tonita J, Yu E, Skarsgard D. Application of the lognormal model for prediction of long-term survival rates from short-term follow-up data in advanced breast cancer. Breast Cancer Res Treat 2002 DEC 2002;76:S82-S82.	Conference presentation		Population-based	5894			1981-1995	Parametric lognormal model	BCSS		5894		The predicted outcomes were statistically correlated with the observed outcomes.
9	Tortajada S, Lopez Guerra JL, Palacios D, Perez-Gonzalez A, Garcia-Gomez JM, Gonzalez Otal R, et al. Naive Bayes models for predicting the risk of loco-regional relapse in breast cancer patients. Radiotherapy and Oncology 2014 2014;111:S59.	Conference presentation	retrospective		84			2006	Naive Bayes	Risk of LRR	Age, histology, ER status, PR status, HER2 status, axillary lymph node status, stage, surgery, radiotherapy, chemotherapy, hormonal treatment		6-fold cross validation	The model showed good performance.
10	Williams RJL, Fryatt IJC, White H, Thompson JN. A Prognostic Index in Radical Excision and Omental Transposition for Locally Advanced and Recurrent Breast-Cancer. Br J Surg 1988 DEC 1988;75(12):1271-1271.	Conference presentation			379				Cox PH regression	OS	Monoclonal antibody NCRC-11 staining, node stage, grade	379		The model showed good performance.
										DFS
11	Witteveen A, Ruiter JW, Bretveld R, Groothuis-Oudshoorn CGM, Vliegen IMH, Jzerman MJ, et al. Towards personalised breast cancer follow-up: Prediction model for recurrence and allocation of visits during 10 years of follow-up. Eur J Cancer 2016 April 2016;57:S141.	Conference presentation	Retrospective	population-based	8035	non-metastatic after surgery	Netherlands	2003	Cox PH regression	Risk of LRR	Age, size, grade, lymph nodes, hormone status, surgery type, radiotherapy, hormone therapy, chemotherapy			The model could be used to identify patients with a low or high risk.
